# Supplementary material for: Design, Synthesis and Activity of New N1-Alkyl Tryptophan Functionalized Dendrimeric Peptides against Glioblastoma
Source: MDPI journal article supplement (doi:10.3390/biom12081116), 2022-08-13
Supplement: s1 [file s1]

# Design, Synthesis and Activity of New $N^1$ -Alkyl Tryptophan Functionalized Dendrimeric Peptides against Glioblastoma

Marta Sowińska <sup>1,†</sup>, Monika Szeliga <sup>2,†,\*</sup>, Maja Morawiak <sup>1</sup>, Barbara Zabłocka <sup>2</sup> and Zofia Urbanczyk-Lipkowska <sup>1,\*</sup>

<sup>1</sup> Institute of Organic Chemistry PAS, 01-224 Warsaw, Poland

<sup>2</sup> Mossakowski Medical Research Institute PAS, 02-106 Warsaw, Poland

\* Correspondence: mszeliga@imdik.pan.pl (M.S.); zofia.lipkowska@icho.edu.pl (Z.U.-L.)

† These authors contributed equally to this work.

## Supplementary Material S1

### S1.1. Synthesis of N-alkyl derivatives of tryptophan, dendrimers and their analytical data

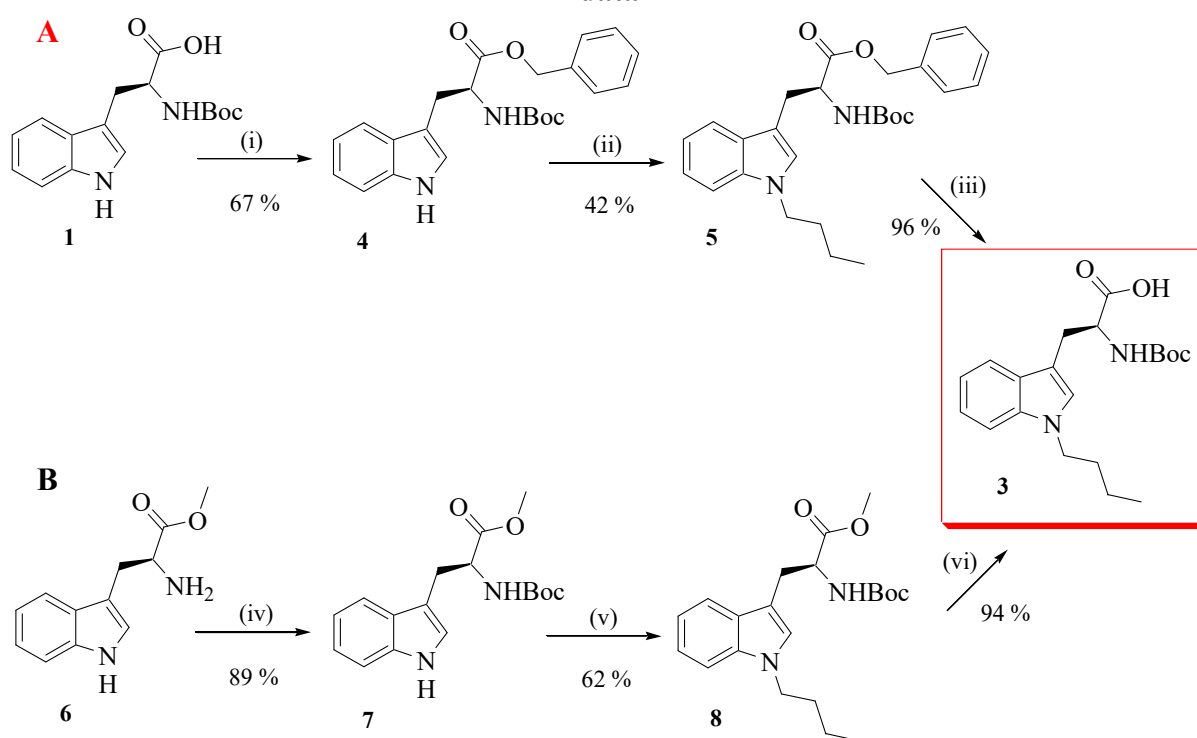

**Scheme S1.** Synthesis of  $N^1$ -Boc-1-butyltryptophan (3). A – (i) BnBr, Cs<sub>2</sub>CO<sub>3</sub>, DMF, rt., 6 h.; (ii) n-BuBr, NaH, DMF, 0 °C, 1.5 h.; (iii) H<sub>2</sub>/10% Pd-C, MeOH, 3.5 h.; B – (iv) (Boc)<sub>2</sub>O, NaOH, H<sub>2</sub>O/dioksan, r.t., 24 h; (v) n-BuBr, NaH, DMF, 0 °C, 2.5 h; (vi) 1) 1M NaOH, MeOH, 50 °C, 1.5 h; 2) 1M HCl.

### ***N*-Boc-1-butyltryptofan (3)**

Alcaline hydrolysis of 2.27 g (6.06 mmol, 1 eq.) of the ester **8** dissolved in 40 mL MeOH and addition of 12 mL (2 eq.) of 1 M NaOH was performed for 1.5 h. Product **3** was obtained in the form of colorless oil which after drying in dessicator over P<sub>2</sub>O<sub>5</sub> solidified to a white powder; yield 94% (2.05 g).

C<sub>20</sub>H<sub>28</sub>O<sub>4</sub>N<sub>2</sub>, M = 360.45 (monoisotopic mass 360.2).

**LRMS** (ESI, EtOAc): 743.4 [2M + Na<sup>+</sup>], 383.3 [M + Na<sup>+</sup>] - *main signals*, 361.5 [M + H<sup>+</sup>], 283.4 [M – Boc + Na<sup>+</sup>], 719.7 [2M – H<sup>+</sup>, *negative ions*] - *main signals*, 359.4 [M – H<sup>+</sup>, *negative ions*].

[ $\alpha$ ]<sub>D</sub><sup>25</sup> = +7.8 (c 1, MeOH), -6.8 (c 1, 1 M NaOH).

R<sub>f</sub> = 0.42 (CHCl<sub>3</sub>/MeOH 8:1).

**m.p.:** 120-122.3 °C.

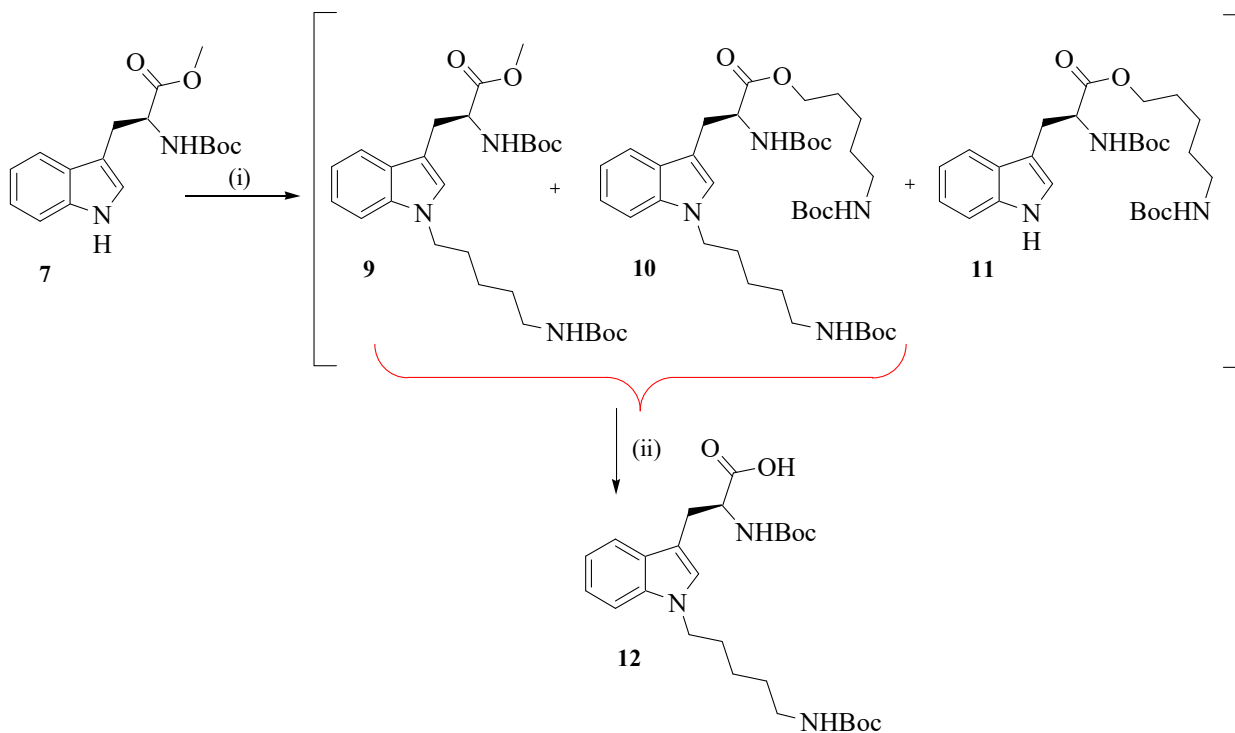

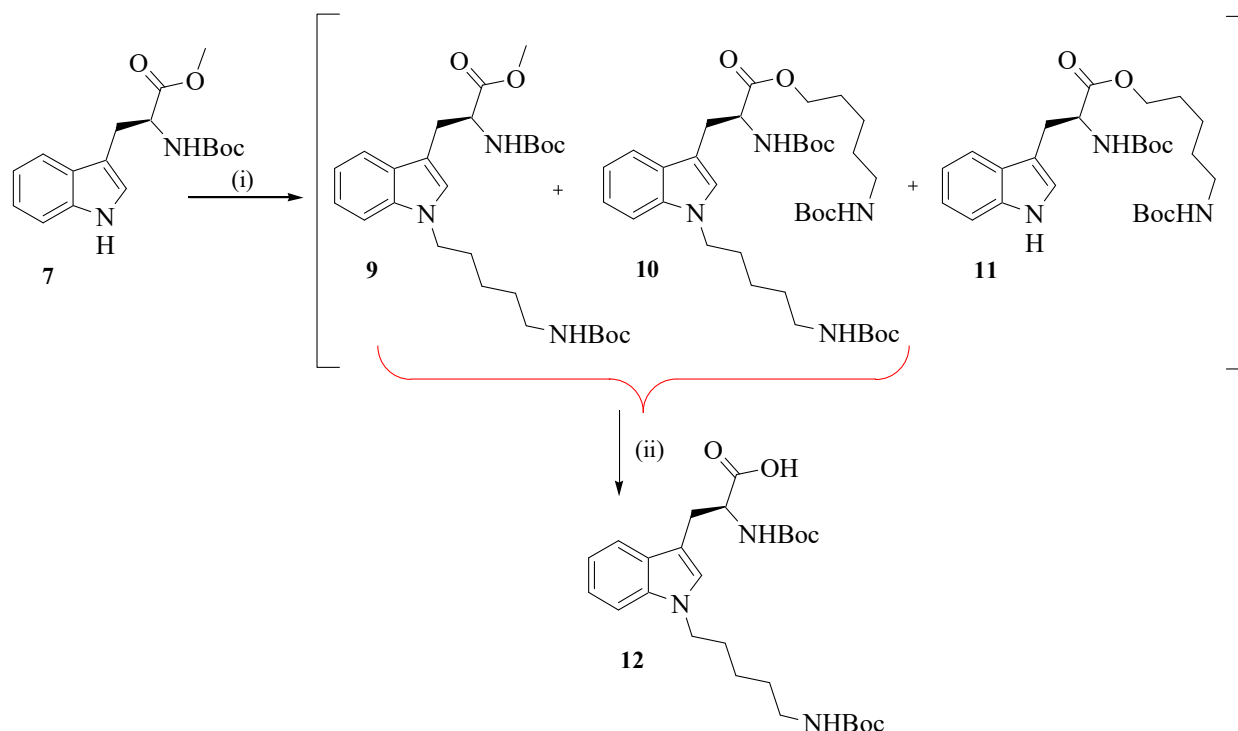

**Scheme S2.** Synthesis of *N*-Boc-1-[5-(Boc-amino)pentyl]tryptophan (**12**). (i)  $\text{MeSO}_2\text{O}(\text{CH}_2)_5\text{NHBoc}$ , NaH, DMF, r.t., 24 h; (ii) 1) 1M NaOH, MeOH, 50 °C, 2 h; 2) 1M HCl.

#### b) *N*-Boc-1-[5-(Boc-amino)pentyl]tryptophan (**12**)

To a suspension of NaH (301.6 mg, 7.54 mmol, 1.2 eq., 60% suspension in mineral oil) in 10 mL DMF, cooled to 0 °C, solution of Boc-Trp-OMe (**7**, 2 g, 6.28 mmol, 1 eq.) in 15 mL DMF was added and stirred for 30 min. Then reaction mixture was warmed to r.t. and three portions of 5-(Boc-amino)pentyl mesylate (**8**, 3.53 g, 12.56 mmol, 2 eq.) in 10 mL DMF were added. Then temperature was raised to 50 °C and stirring was continued for 24 h. After this time reaction mixture was poured down to 40 mL of a cold water and extracted with EtOAc (3 × 30 mL). Organic phase was rinsed with H<sub>2</sub>O (20 mL) and brine (20 mL) and dried over MgSO<sub>4</sub>. Solvent evaporation yielded yellow oil, which was dissolved in 100 mL MeOH. To this solution 30 mL of 1 M water solution of NaOH was added and stirred for 2h in 50 °C. Reaction mixture was evaporated and 40 mL of H<sub>2</sub>O was added. Mixture was acidified with 1 M HCl to pH = 2 and extracted with EtOAc (3 × 20 mL). Organic phase was dried over MgSO<sub>4</sub> and the solvent was evaporated. Crude product was purified with two steps of silica gel chromatography. First with CHCl<sub>3</sub>/MeOH (gradient 100:1→15:1), and second with EtOAc/hexane (gradient 1:9→3:7), and finally eluted with EtOAc. Pure product was obtained as a white powder that was dried over P<sub>2</sub>O<sub>5</sub> (1.1 g, 35.8%) yield.

$\text{C}_{26}\text{H}_{39}\text{O}_6\text{N}_3$ ,  $M = 489.60$  (monoisotopic mass 489.3).

**LRMS** (ESI, MeOH): 544.4 [ $M + \text{MeOH} + \text{Na}^+$ ], 534.4 [ $M + 2\text{Na}^+ - \text{H}^+$ ]<sup>+</sup>, 528.3 [ $M + \text{K}^+$ ], 512.5 [ $M + \text{Na}^+$ ] - *main signals*, 490.4 [ $M + \text{H}^+$ ].

**<sup>1</sup>H NMR (500 MHz, MeOD):**  $\delta$  = 1.17-1.51 [br m, 22H, 2×C(CH<sub>3</sub>)<sub>3</sub>, CH<sub>2</sub>-3,4 5-AP], 1.80 (m, 2H, CH<sub>2</sub>-2 5-AP), 2.98 (br t, 2H, CH<sub>2</sub>-5 5-AP), 3.10 (m, 1H, βCH<sub>2</sub>), 3.27 (m, 1H, βCH<sub>2</sub>), 4.11 (br t, 2H, CH<sub>2</sub>-1 5-AP), 4.40 (m, 1H, αCH), 7.01 (br t, 1H, C<sup>5</sup>-H), 7.04 (s, 1H, C<sup>2</sup>-H), 7.12 (br t, 1H, C<sup>6</sup>-H), 7.32 (d,  $J$  = 8.18 Hz, 1H, C<sup>7</sup>-H), 7.56 (d,  $J$  = 7.83 Hz, 1H, C<sup>4</sup>-H).

**<sup>13</sup>C NMR (500 MHz, MeOD):**  $\delta$  = 25.1 (C<sup>3</sup> 5-AP), 28.4 (βC), 28.6, 28.8 [2×C(CH<sub>3</sub>)<sub>3</sub>], 30.6 (C<sup>4</sup> 5-AP), 31.0 (C<sup>2</sup> 5-AP), 41.2 (C<sup>5</sup> 5-AP), 46.8 (C<sup>1</sup> 5-AP), 56.0 (αC), 79.8, 80.5 [2×C(CH<sub>3</sub>)<sub>3</sub>], 110.5 (C<sup>7</sup>), 110.6 (C<sup>3</sup>), 119.8 (C<sup>5</sup>), 119.9 (C<sup>4</sup>), 122.4 (C<sup>6</sup>), 127.9 (C<sup>2</sup>), 129.6 (C<sup>3a</sup>), 137.7 (C<sup>7a</sup>), 157.7, 158.5 [2×C=O (Boc)], 175.8 (CO<sub>2</sub>H).

**[α]<sub>D</sub><sup>25</sup>** = +1.3 (c 1, MeOH).

**R<sub>f</sub>** = 0.47 (CHCl<sub>3</sub>/MeOH 8:1).

**m.p.:** 105.9-108.4°C.

## S1.2. Analytical data for the new dendrimers

### Dendrimer 19

Dendrimer 19 was obtained with 97.6% (0.41 g) yield from 0.5 g (0.16 mmol) of dendrimer 16. as creamy powder.

C<sub>128</sub>H<sub>184</sub>O<sub>15</sub>N<sub>24</sub>×8HCl, M = 2590.67 (monoisotopic mass of non-protonated dendrimer - 2298.3).

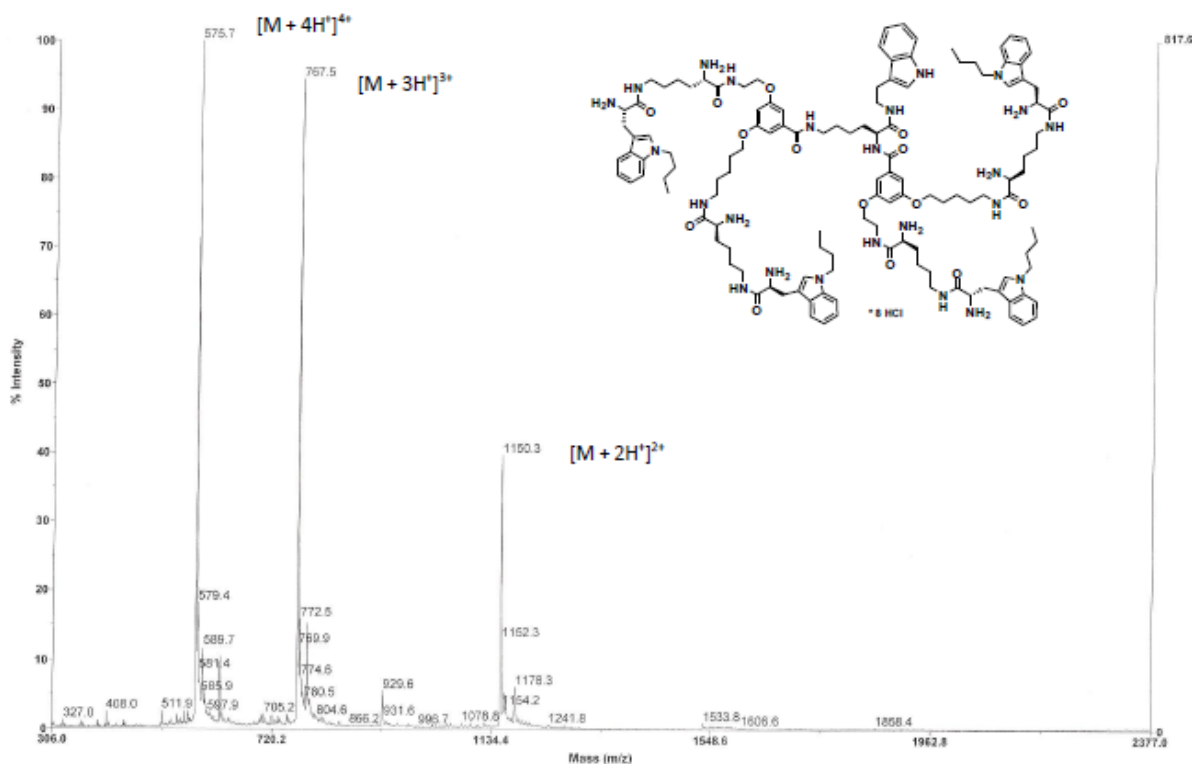

**LRMS (ESI, MeOH):** 1149.8 [M + 2H]<sup>2+</sup>, 766.9 [M + 3H]<sup>3+</sup>, 575.4 [M + 4H]<sup>4+</sup> - main signals.

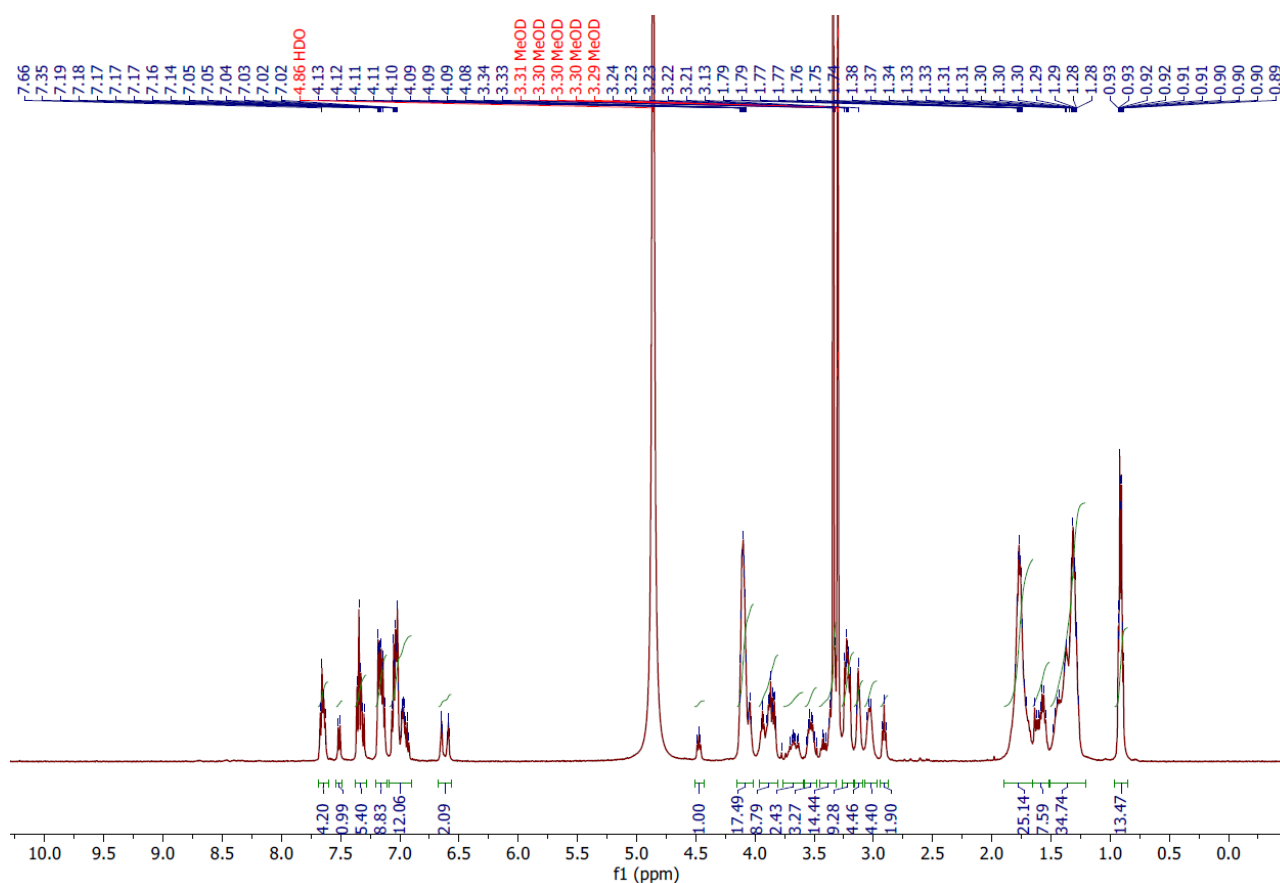

$^1\text{H}$  NMR (500 MHz, MeOD):  $\delta$  = 0.91 (m, 12H,  $4\times\text{CH}_3$  *n*-Bu), 1.24-1.86 [br m, 58H,  $5\times\beta$ ,  $\gamma$ ,  $\delta\text{CH}_2$  *L*-Lys and *core*,  $2\times\text{O-CH}_2\text{-(CH}_2)_3\text{-CH}_2\text{-NH}$ ,  $4\times\text{CH}_2\text{-2,3 } n\text{-Bu}$ ], 2.91 (t,  $J$  = 7.25 Hz, 2H,  $\text{CH}_2\text{-Ar TA}$ ), 3.03 [m, 4H,  $2\times\text{O-(CH}_2)_4\text{-CH}_2\text{-NH}$ ], 3.13 (m, 4H,  $2\times\epsilon\text{CH}_2$  *L*-Lys), 3.19-3.40 (br m, 14H,  $3\times\epsilon\text{CH}_2$  *L*-Lys *i core*,  $\beta\text{CH}_2$  *B*-Trp), 3.42 (m, 1H,  $\text{CH}_2\text{-NH TA}$ ), 3.53 (m, 3H,  $\text{O-CH}_2\text{-CH}_2\text{-NH}$ ,  $\text{CH}_2\text{-NH TA}$ ), 3.67 (m, 2H,  $\text{O-CH}_2\text{-CH}_2\text{-NH}$ ), 3.81-3.98 [br m, 8H,  $2\times\text{O-CH}_2\text{-(CH}_2)_4\text{-NH}$ ,  $4\times\alpha\text{CH } L\text{-Lys}$ ], 4.02-4.15 (br m, 16H,  $4\times\alpha\text{CH } B\text{-Trp}$ ,  $2\times\text{O-CH}_2\text{-CH}_2\text{-NH}$ ,  $4\times\text{CH}_2\text{-1 } n\text{-Bu}$ ), 4.48 (m, 1H,  $\alpha\text{CH } core$ ), 6.59, 6.65 (2m, 2H,  $\text{C}^4\text{-H Ph}$ ), 6.91-7.08 (br m, 11H,  $\text{C}^{2,6}\text{-H Ph}$ ,  $\text{C}^5\text{-H } B\text{-Trp}$ ,  $\text{C}^{2,5,6}\text{-H TA}$ ), 7.17 (m, 8H,  $\text{C}^{2,6}\text{-H } B\text{-Trp}$ ), 7.34 (m, 5H,  $\text{C}^7\text{-H } B\text{-Trp}$ ,  $\text{C}^7\text{-H TA}$ ), 7.51 (d,  $J$  = 6.85 Hz, 1H,  $\text{C}^4\text{-H TA}$ ), 7.65 (m, 4H,  $\text{C}^4\text{-H } B\text{-Trp}$ ).

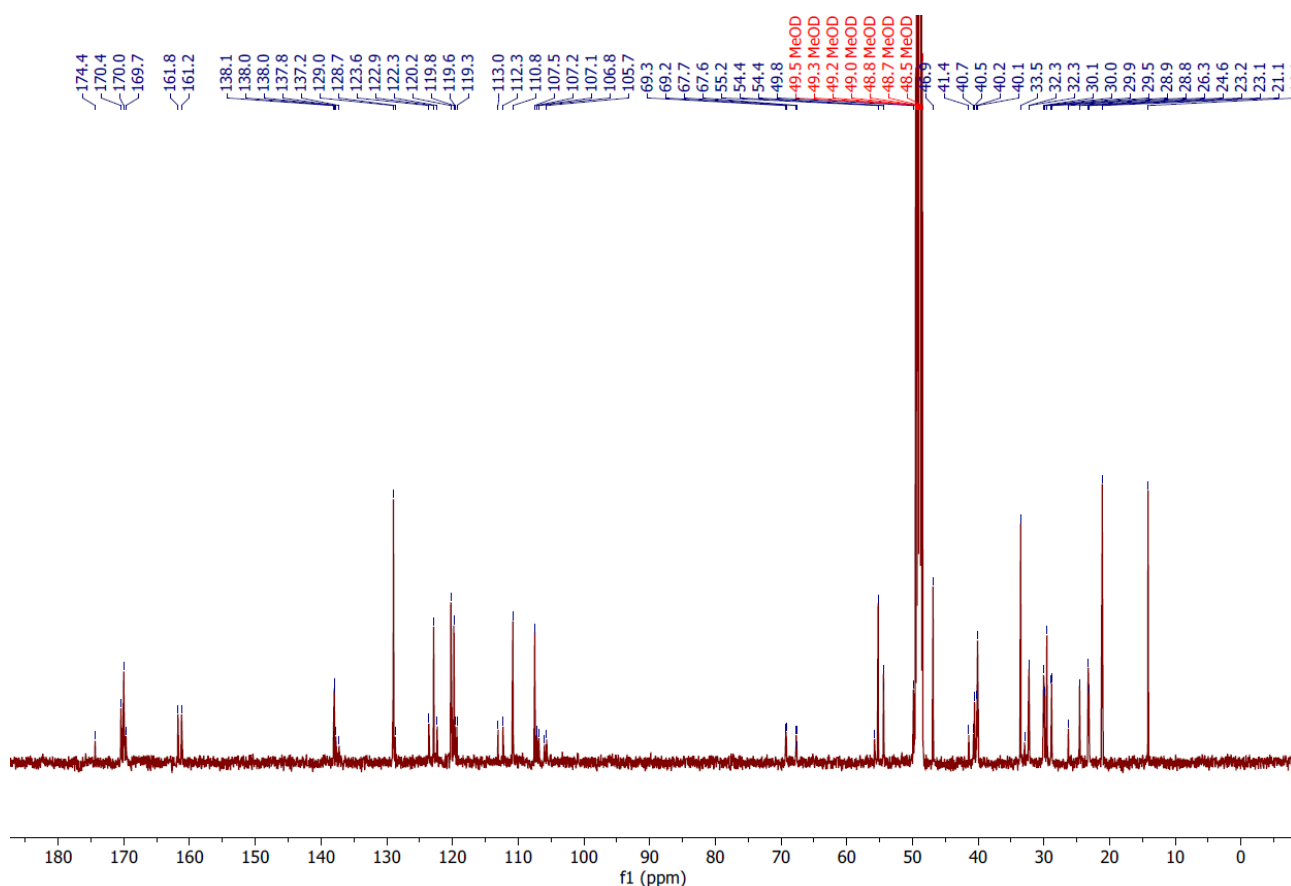

$^{13}\text{C}$  NMR (125 MHz, MeOD):  $\delta$  = 14.1 ( $\text{C}^4$  *n*-Bu), 21.1 ( $\text{C}^3$  *n*-Bu), 23.1, 23.2, 24.6 [ $\gamma\text{C}$ ,  $2\times\text{O}-(\text{CH}_2)_2-\text{CH}_2-(\text{CH}_2)_2-\text{NH}$ ], 26.3 ( $\text{CH}_2\text{-Ar TA}$ ), 28.8, 28.9 ( $\beta\text{C B-Trp}$ ), 29.5, 29.9, 30.0, 30.1 [ $\delta\text{C}$ ,  $2\times\text{O}-\text{CH}_2-\text{CH}_2-\text{CH}_2-\text{CH}_2-\text{NH}$ ], 32.3, 33.5 ( $\beta\text{C}$ ,  $\text{C}^2$  *n*-Bu), 40.1 ( $\epsilon\text{C L-Lys}$ ), 40.2 ( $2\times\text{O}-\text{CH}_2-\text{CH}_2-\text{NH}$ ), 40.6 [ $2\times\text{O}-(\text{CH}_2)_4-\text{CH}_2-\text{NH}$ ], 40.7 ( $\epsilon\text{C core}$ ), 41.4 ( $\text{CH}_2\text{-NH TA}$ ), 46.9 ( $\text{C}^1$  *n*-Bu), 54.4 ( $4\times\alpha\text{C L-Lys}$ ), 55.2 ( $4\times\alpha\text{C B-Trp}$ ), 55.8 ( $\alpha\text{C core}$ ), 67.6, 67.7 ( $2\times\text{O}-\text{CH}_2-\text{CH}_2-\text{NH}$ ), 69.2 [ $2\times\text{O}-\text{CH}_2-(\text{CH}_2)_4-\text{NH}$ ], 105.7, 106.0 ( $\text{C}^4$  *Ph*), 106.8, 107.1, 107.5 ( $\text{C}^{2,6}$  *Ph*), 110.8 ( $\text{C}^7$  *B-Trp*), 112.3 ( $\text{C}^7$  *TA*), 113.0 ( $\text{C}^3$  *TA*), 119.3 ( $\text{C}^4$  *TA*), 119.6 ( $\text{C}^4$  *B-Trp*), 119.8 ( $\text{C}^5$  *TA*), 120.2 ( $\text{C}^5$  *B-Trp*), 122.3 ( $\text{C}^6$  *TA*), 122.9 ( $\text{C}^6$  *B-Trp*), 123.6 ( $\text{C}^2$  *TA*), 128.7 ( $\text{C}^{3a}$  *B-Trp*), 129.0 ( $\text{C}^2$  *B-Trp*), 138.0 ( $\text{C}^{7a}$  *B-Trp*), 138.1 ( $\text{C}^{7a}$  *TA*), 161.2, 161.8 ( $\text{C}^{3,5}$  *Ph*), 170.0, 170.1, 170.5 (CONH).

$[\alpha]_{\text{D}}^{25} = +18.0$  (c 1, MeOH).

**m.p.:** 182-184.5°C.

## Dendrimer 20

Dendrimer **20** was obtained with 89.8% (0.15 g) yield from 0.2 g (0.064 mmol) of dendrimer **17** in the form of creamy powder.

$\text{C}_{130}\text{H}_{199}\text{O}_{15}\text{N}_{23}\times 8\text{HCl}$ ,  $M = 2615.80$  (monoisotopic mass of non-protonated dendrimer - 2324.1).

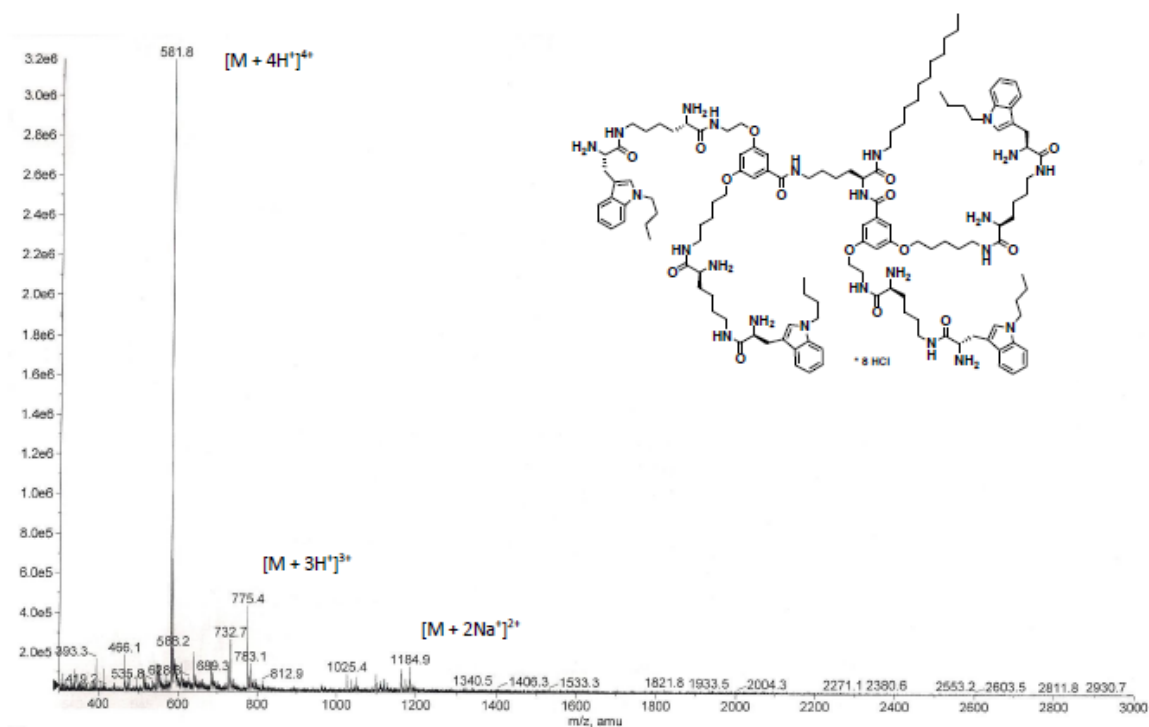

LRMS (ESI, MeOH): 1184.9  $[M + 2Na]^2+$ , 775.4  $[M + 3H]^3+$ , 581.7  $[M + 4H]^4+$  - main signals.

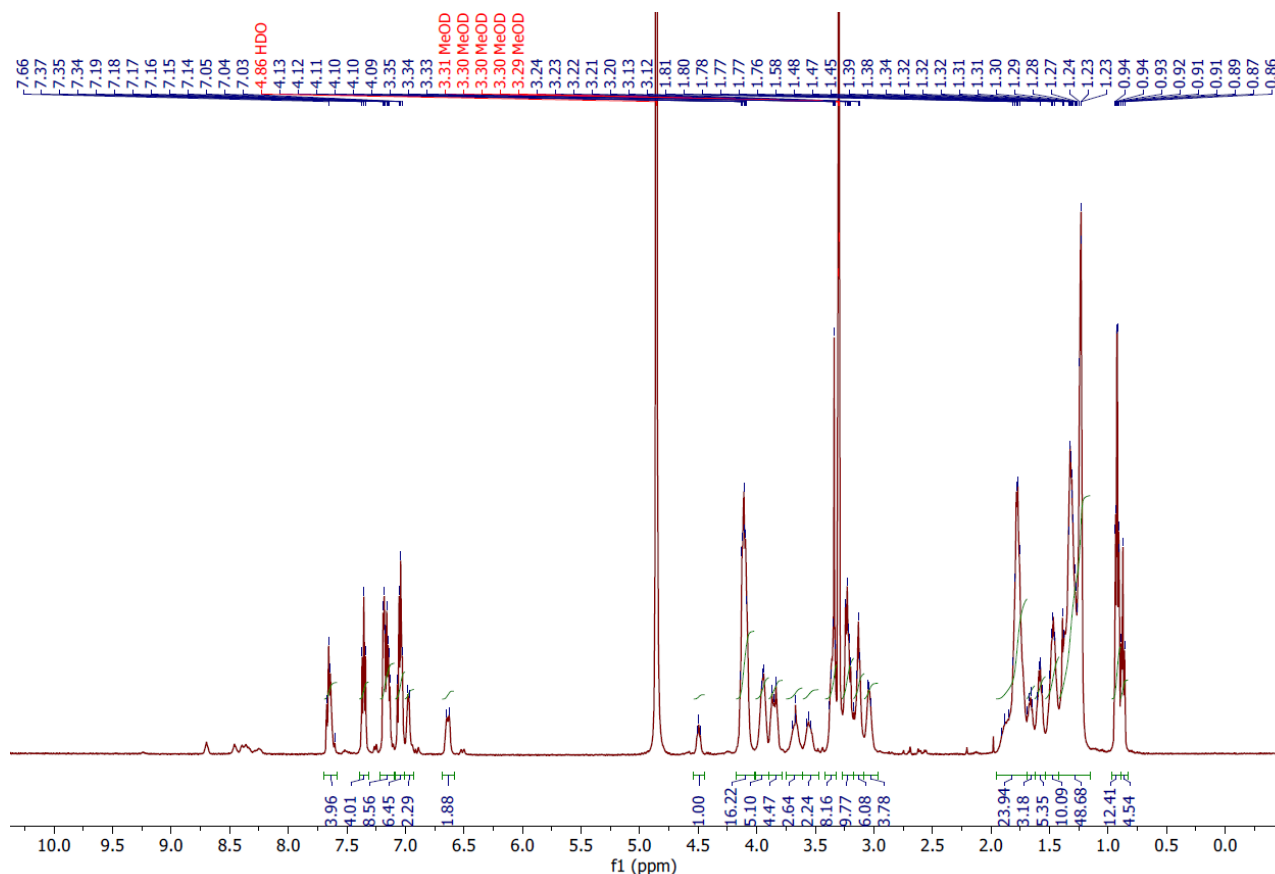

$^1\text{H}$  NMR (500 MHz, MeOD):  $\delta$  = 0.85-0.95 (2m, 15H,  $\text{CH}_3$  DDA,  $4 \times \text{CH}_3$  *n*-Bu), 1.20-1.93 [br m, 78H,  $5 \times \beta$ ,  $\gamma$ ,  $\delta\text{CH}_2$  *L*-Lys and core,  $2 \times \text{O}-\text{CH}_2-(\text{CH}_2)_3-\text{CH}_2-\text{NH}$ ,  $4 \times \text{CH}_2-2,3$  *n*-Bu,  $\text{CH}_2-2-11$  DDA], 3.00-3.34 [br m, 24H,  $5 \times \epsilon\text{CH}_2$  *L*-Lys i core,  $\beta\text{CH}_2$  *B*-Trp,  $2 \times \text{O}-(\text{CH}_2)_4-\text{CH}_2-\text{NH}$ ,  $\text{CH}_2-1$  DDA], 3.56, 3.67 (2m, 4H,  $2 \times \text{O}-\text{CH}_2-\text{CH}_2-\text{NH}$ ), 3.85 (m, 4H,  $4 \times \alpha\text{CH}$  *L*-Lys), 3.95 [m, 4H,  $2 \times \text{O}-\text{CH}_2-(\text{CH}_2)_4-$

NH], 4.12 (m, 16H, 4×αCH *B-Trp*, 2×O-CH<sub>2</sub>-CH<sub>2</sub>-NH, 4×CH<sub>2</sub>-1 *n-Bu*), 4.50 (m, 1H, αCH *core*), 6.64 (m, 2H, C<sup>4</sup>-H *Ph*), 6.98 (m, 2H, C<sup>2,6</sup>-H *Ph*), 7.04 (m, 6H, C<sup>2,6</sup>-H *Ph*, C<sup>5</sup>-H *B-Trp*), 7.17 (m, 8H, C<sup>2,6</sup>-H *B-Trp*), 7.36 (m, 4H, C<sup>7</sup>-H *B-Trp*), 7.65 (m, 4H, C<sup>4</sup>-H *B-Trp*).

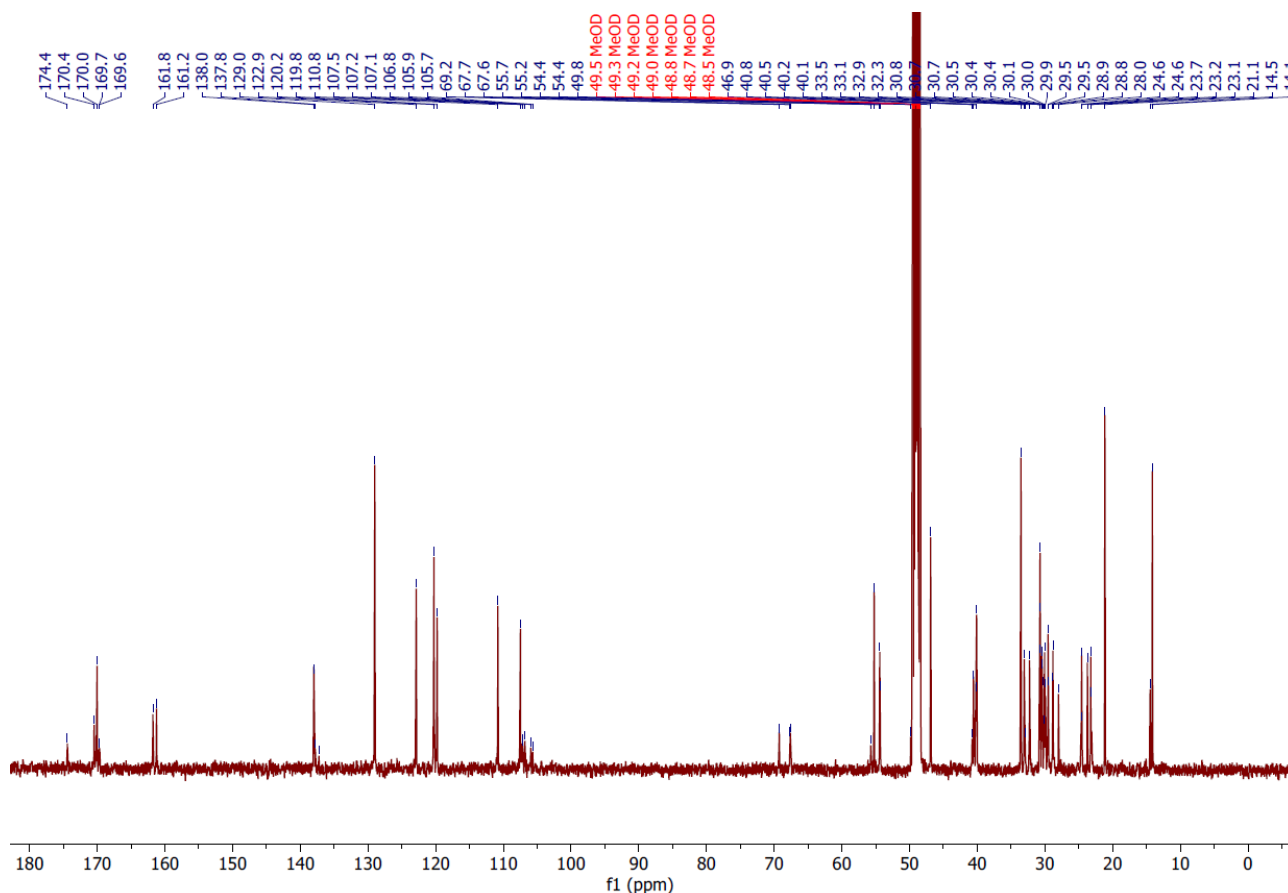

<sup>13</sup>C NMR (125 MHz, MeOD): δ = 14.1 (C<sup>4</sup> *n-Bu*), 14.5 (C<sup>12</sup> *DDA*), 21.1 (C<sup>3</sup> *n-Bu*), 23.1, 23.2, 23.7, 24.6 [γC, C<sup>11</sup> *DDA*, 2×O-(CH<sub>2</sub>)<sub>2</sub>-CH<sub>2</sub>-(CH<sub>2</sub>)<sub>2</sub>-NH], 28.0 (C<sup>3</sup> *DDA*), 28.8, 28.9 (βC *B-Trp*), 29.5, 29.9, 30.1, 30.4-30.8 [δC, C<sup>2</sup>, C<sup>4</sup>-C<sup>10</sup> *DDA*, 2×O-CH<sub>2</sub>-CH<sub>2</sub>-CH<sub>2</sub>-CH<sub>2</sub>-NH], 32.3, 32.9, 33.1, 33.5 (βC, C<sup>2</sup> *n-Bu*), 40.1 (εC *L-Lys*), 40.2 (2×O-CH<sub>2</sub>-CH<sub>2</sub>-NH), 40.6 [2×O-(CH<sub>2</sub>)<sub>4</sub>-CH<sub>2</sub>-NH, C<sup>1</sup> *DDA*], 40.8 (εC *core*), 46.9 (CH<sub>2</sub>-1 of *n-Bu*), 54.4 (4×αC *L-Lys*), 55.2 (4×αC *B-Trp*), 55.7 (αC *core*), 67.6 (2×O-CH<sub>2</sub>-CH<sub>2</sub>-NH), 69.2 [2×O-CH<sub>2</sub>-(CH<sub>2</sub>)<sub>4</sub>-NH], 105.7, 106.0 (C<sup>4</sup> *Ph*), 106.8, 107.2, 107.5 (C<sup>2,6</sup> *Ph*), 110.8 (C<sup>7</sup> *B-Trp*), 119.8 (C<sup>4</sup> *B-Trp*), 120.2 (C<sup>5</sup> *B-Trp*), 122.9 (C<sup>6</sup> *B-Trp*), 129.0 (C<sup>2</sup> *B-Trp*), 137.8 (C<sup>1</sup> *Ph*), 138.0 (C<sup>7a</sup> *B-Trp*), 161.2, 161.8 (C<sup>3,5</sup> *Ph*), 169.6 (CONH *Ph*), 170.0, 170.5, 174.4 (CONH).

[α]<sub>D</sub><sup>25</sup> = +12.3 (c 1, MeOH).

m.p.: 174-177°C.

## Dendrimer 21

Dendrimer **21** was obtained from 0.42 g (0.127 mmol) of **18** in the form of a pale yellow powder ; yield 95.8% (0.34 g) z 0.42 g.

C<sub>142</sub>H<sub>223</sub>O<sub>15</sub>N<sub>23</sub>×8HCl, M = 2784.12 (monoisotopic mass of non-protonated dendrimer - 2492.4).



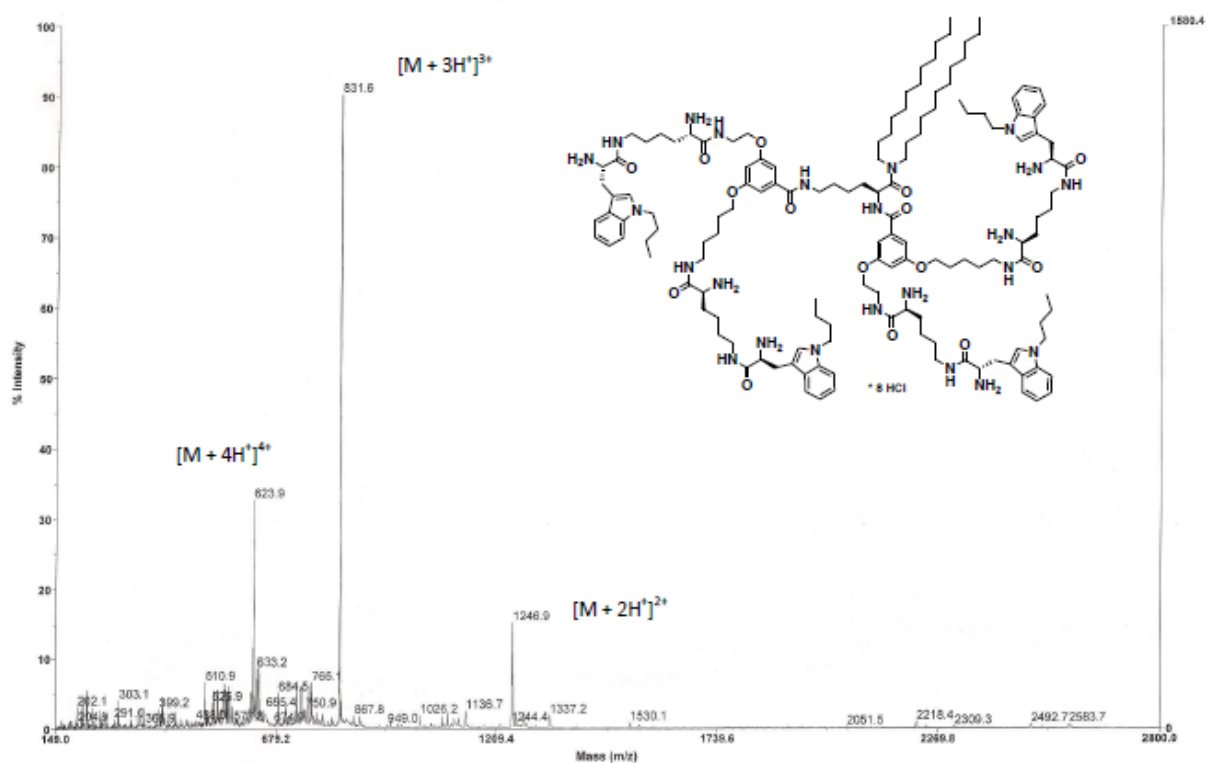

LRMS (ESI, MeOH): 1246.4  $[M + 2H^+]^{2+}$ , 831.2  $[M + 3H^+]^{3+}$  - main signals, 623.7  $[M + 4H^+]^{4+}$ .

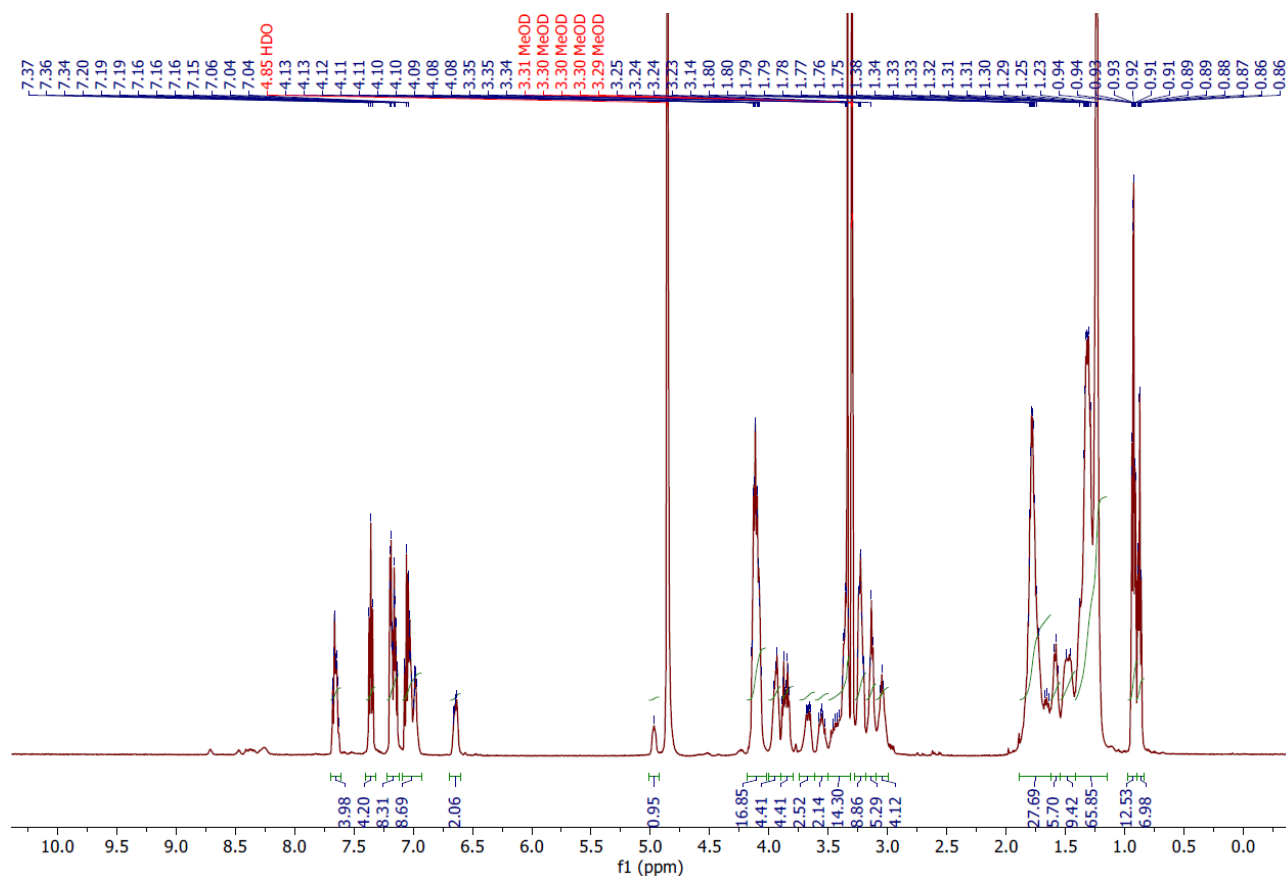

$^1\text{H}$  NMR (500 MHz, MeOD):  $\delta$  = 0.88 (m, 6H,  $2 \times \text{CH}_3$  *dDDA*), 0.93 (m, 12H,  $4 \times \text{CH}_3$  *n-Bu*), 1.20-1.90 [br m, 98H,  $5 \times \beta$ ,  $\gamma$ ,  $\delta\text{CH}_2$  *L-Lys* and *core*,  $2 \times \text{O-CH}_2-(\text{CH}_2)_3\text{-CH}_2\text{-NH}$ ,  $4 \times \text{CH}_2\text{-2,3 } n\text{-Bu}$ ,  $2 \times \text{CH}_2\text{-2-11 } d\text{DDA}$ ], 3.00-3.49 [br m, 26H,  $5 \times \epsilon\text{CH}_2$  *L-Lys* and *core*,  $\beta\text{CH}_2$  *B-Trp*,  $2 \times \text{O}-(\text{CH}_2)_4\text{-CH}_2\text{-}$

NH, 2×CH<sub>2</sub>-1 *dDDA*], 3.56, 3.67 (2m, 4H, 2×O-CH<sub>2</sub>-CH<sub>2</sub>-NH), 3.86 (m, 4H, 4×αCH *L-Lys*), 3.94 [m, 4H, 2×O-CH<sub>2</sub>-(CH<sub>2</sub>)<sub>4</sub>-NH], 4.11 [m, 16H, 4×αCH *B-Trp*, 2×O-CH<sub>2</sub>-CH<sub>2</sub>-NH, 4×CH<sub>2</sub>-1 *n-Bu*], 4.97 (m, 1H, αCH *core*), 6.65 (m, 2H, C<sup>4</sup>-H *Ph*), 6.95-7.08 (br m, 8H, C<sup>2,6</sup>-H *Ph*, C<sup>5</sup>-H *B-Trp*), 7.17 (m, 8H, C<sup>2,6</sup>-H *B-Trp*), 7.36 (m, 4H, C<sup>7</sup>-H *B-Trp*), 7.65 (m, 4H, C<sup>4</sup>-H *B-Trp*).

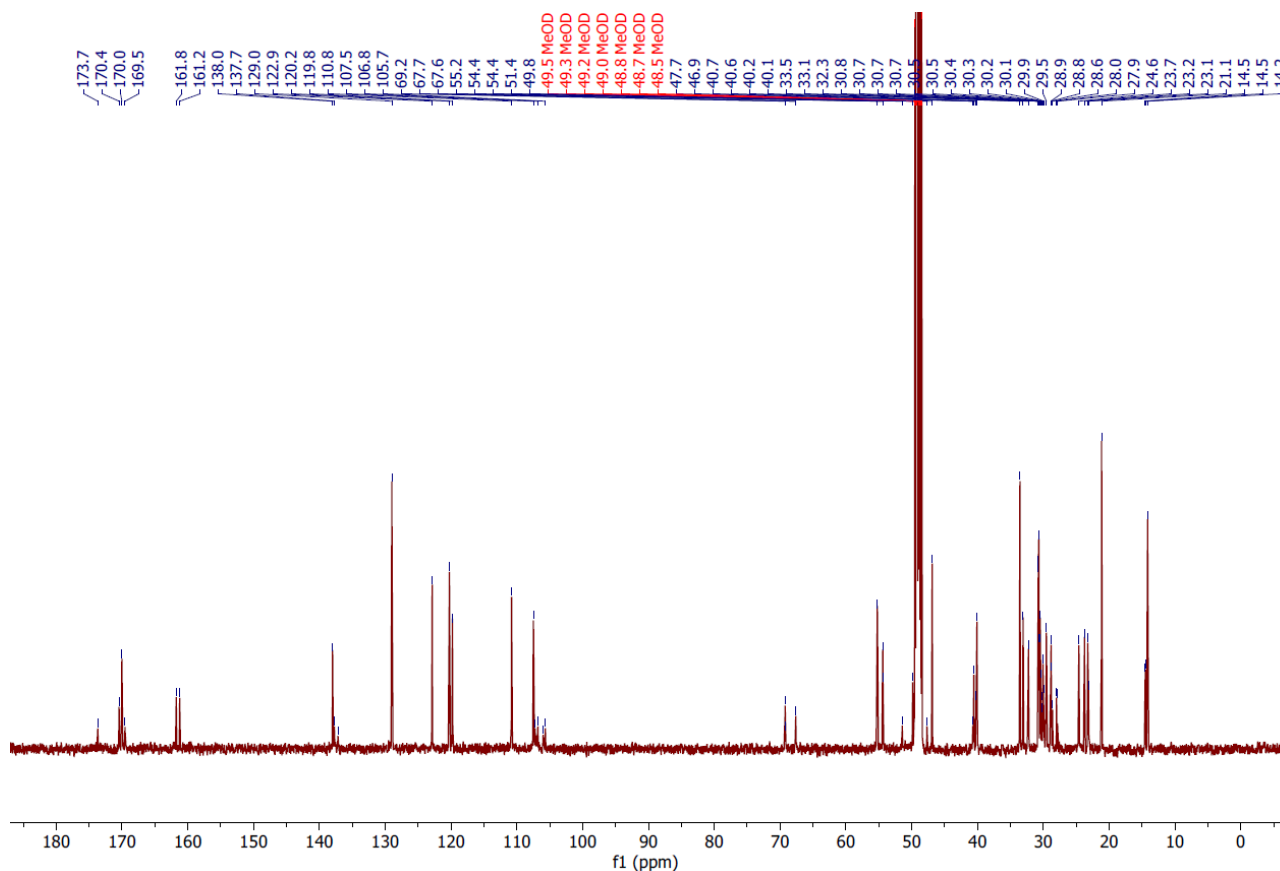

<sup>13</sup>C NMR (125 MHz, MeOD): δ = 14.2 (C<sup>4</sup> *n-Bu*), 14.5 (2×C<sup>12</sup> *dDDA*), 21.2 (C<sup>3</sup> *n-Bu*), 23.1, 23.2, 23.7, 23.8, 24.6 [γC, 2×C<sup>11</sup> *dDDA*, 2×O-(CH<sub>2</sub>)<sub>2</sub>-CH<sub>2</sub>-(CH<sub>2</sub>)<sub>2</sub>-NH], 27.9, 28.0 (2×C<sup>3</sup> *dDDA*), 28.6, 28.8 (βC *B-Trp*), 29.5, 30.0, 30.1, 30.2, 30.4, 30.5-30.8 [δC, 2×C<sup>2</sup>, 2×C<sup>4</sup>-C<sup>10</sup> *dDDA*, 2×O-CH<sub>2</sub>-CH<sub>2</sub>-CH<sub>2</sub>-CH<sub>2</sub>-CH<sub>2</sub>-NH], 32.3, 33.1, 33.6 (βC, C<sup>2</sup> *n-Bu*), 40.1 (εC *L-Lys*), 40.2 (2×O-CH<sub>2</sub>-CH<sub>2</sub>-NH), 40.6 [2×O-(CH<sub>2</sub>)<sub>4</sub>-CH<sub>2</sub>-NH], 40.7 (εC *core*), 46.9 (C<sup>1</sup> *n-Bu*), 47.7 (2×C<sup>1</sup> *dDDA*), 51.4 (αC *core*), 54.4 (4×αC *L-Lys*), 55.2 (4×αC *B-Trp*), 67.7 (2×O-CH<sub>2</sub>-CH<sub>2</sub>-NH), 69.2 [2×O-CH<sub>2</sub>-(CH<sub>2</sub>)<sub>4</sub>-NH], 105.8, 106.0 (C<sup>4</sup> *Ph*), 106.8, 107.2, 107.5 (C<sup>2,6</sup> *Ph*), 110.8 (C<sup>7</sup> *B-Trp*), 119.8 (C<sup>4</sup> *B-Trp*), 120.3 (C<sup>5</sup> *B-Trp*), 122.9 (C<sup>6</sup> *B-Trp*), 129.0 (C<sup>2</sup> *B-Trp*), 137.7 (C<sup>1</sup> *Ph*), 138.0 (C<sup>7a</sup> *B-Trp*), 161.2, 161.8 (C<sup>3,5</sup> *Ph*), 169.5 (CONH *Ph*), 170.0, 170.5, 173.7 (CONH).

[α]<sub>D</sub><sup>25</sup> = +8.9 (c 1, MeOH).

m.p.: 175-178°C.

## Dendrimer 24

Dendrimer **24** was obtained with 97.8% (0.27 g) yield from 0.35 g (0.097 mmol) of dendrimer **22**.

$C_{132}H_{196}O_{15}N_{28} \times 12HCl$ ,  $M = 2852.68$  g/mol (monoisotopic mass of non-protonated dendrimer - 2413.5). Mass without 12HCl  $M = 2415.15$ .

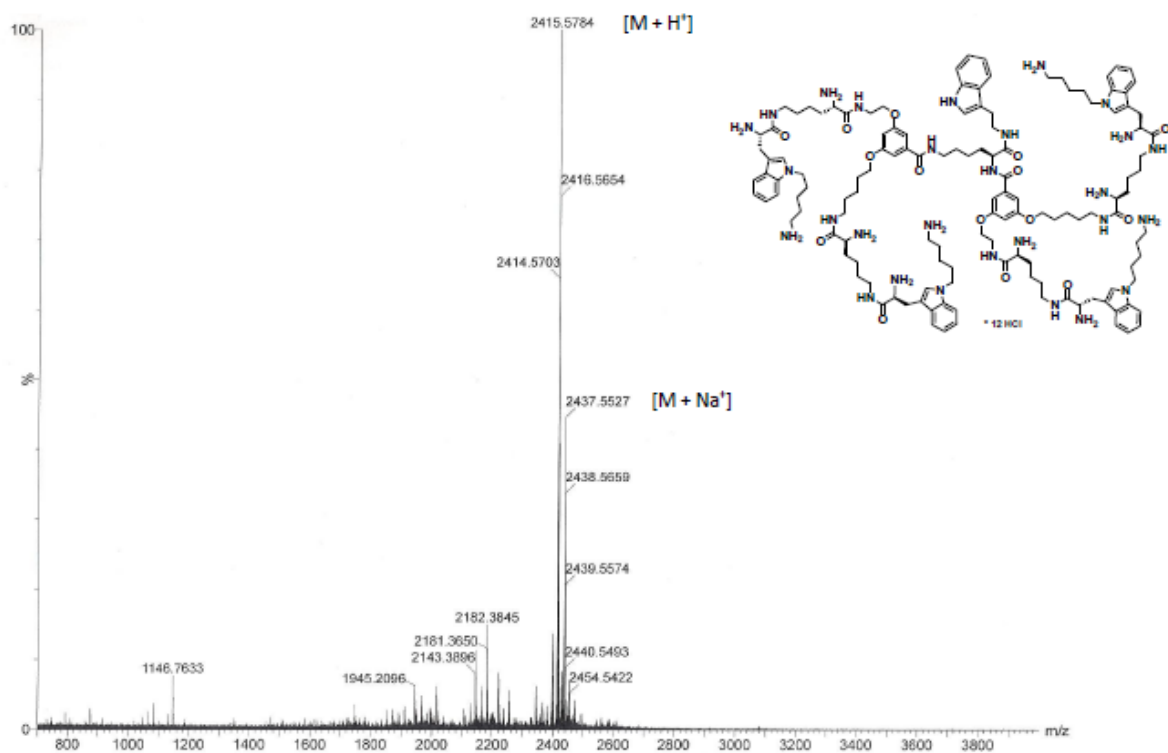

LRMS (ESI, MeOH): 617.9  $[M + MeOH + 3H^+ + Na^+]^{4+}$ , 604.4  $[M + 4H^+]^{4+}$  - main signals;  
(MALDI): 2436.54  $[M + Na^+]$ , 2414.57  $[M + H^+]$  - main signals.

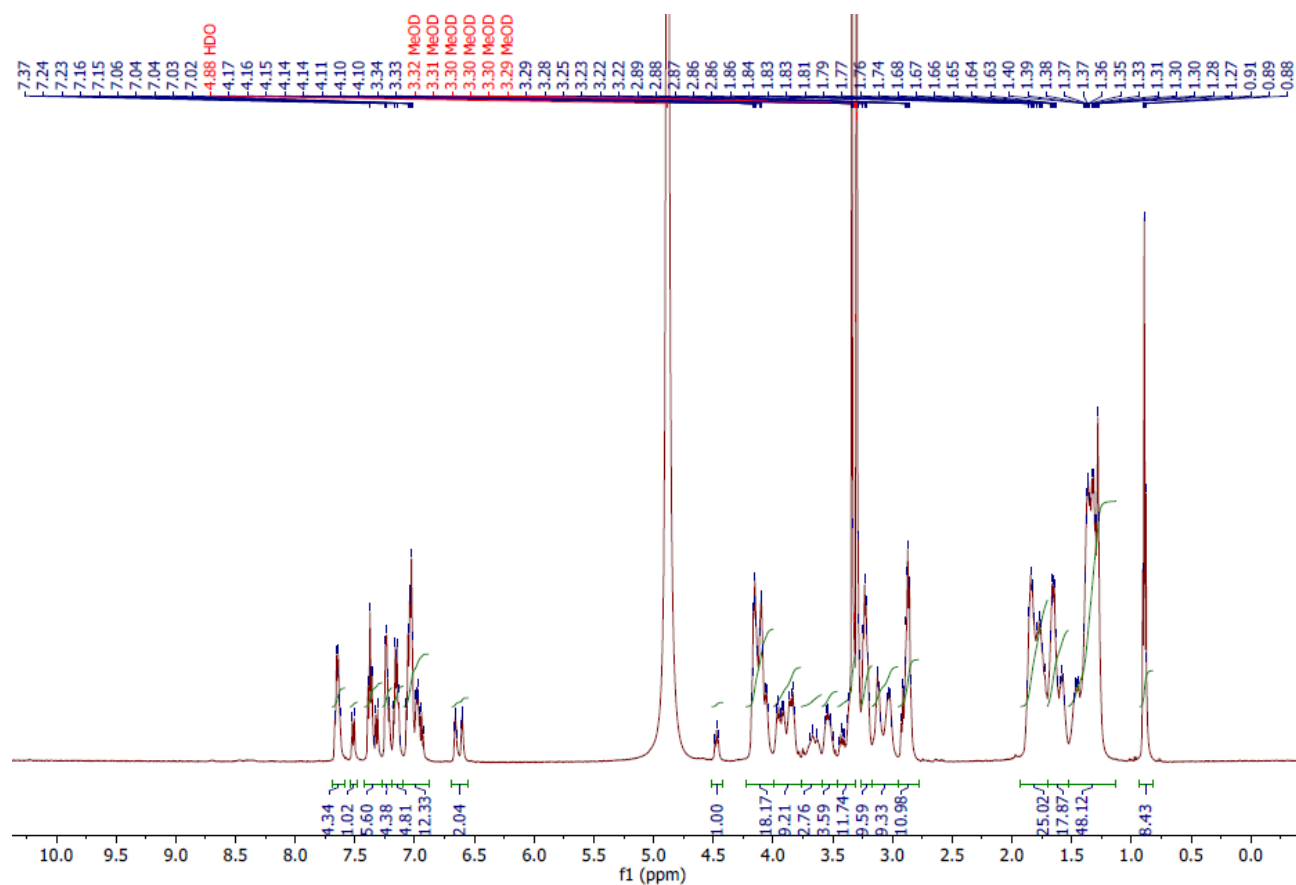

**<sup>1</sup>H NMR** (500 MHz, MeOD):  $\delta$  = 1.24-1.89 [br m, 66H, 5 $\times$  $\beta$ ,  $\gamma$ ,  $\delta$ CH<sub>2</sub> *L*-Lys and *core*, 2 $\times$ O-CH<sub>2</sub>-(CH<sub>2</sub>)<sub>3</sub>-CH<sub>2</sub>-NH, 4 $\times$ CH<sub>2</sub>-2,3,4 5-*AP*], 2.87 (m, 10H, CH<sub>2</sub>-Ar *TA*, 4 $\times$ CH<sub>2</sub>-5 5-*AP*), 2.99-3.40 [br m, 22H, 5 $\times$  $\epsilon$ CH<sub>2</sub> *L*-Lys and *core*,  $\beta$ CH<sub>2</sub> *AP*-*Trp*, 2 $\times$ O-(CH<sub>2</sub>)<sub>4</sub>-CH<sub>2</sub>-NH], 3.40-3.76 (br m, 6H, 2 $\times$ O-CH<sub>2</sub>-CH<sub>2</sub>-NH, CH<sub>2</sub>-NH *TA*), 3.80-3.99 [br m, 8H, 2 $\times$ O-CH<sub>2</sub>-(CH<sub>2</sub>)<sub>4</sub>-NH, 4 $\times$  $\alpha$ CH *L*-Lys], 4.02-4.20 (br m, 16H, 2 $\times$ O-CH<sub>2</sub>-CH<sub>2</sub>-NH, 4 $\times$ CH<sub>2</sub>-1 5-*AP*, 4 $\times$  $\alpha$ CH *AP*-*Trp*), 4.48 (m, 1H,  $\alpha$ CH *core*), 6.62 (m, 2H, C<sup>4</sup>-H *Ph*), 6.92-7.07 (br m, 11H, C<sup>2,6</sup>-H *Ph*, C<sup>5</sup>-H *AP*-*Trp*, C<sup>2,5,6</sup>-H *TA*), 7.15 (m, 4H, C<sup>6</sup>-H *AP*-*Trp*), 7.24 (m, 4H, C<sup>2</sup>-H *AP*-*Trp*), 7.32 (d,  $J$  = 8.08 Hz, 1H, C<sup>7</sup>-H *TA*), 7.37 (m, 4H, C<sup>7</sup>-H *AP*-*Trp*), 7.51 (d,  $J$  = 7.84 Hz, 1H, C<sup>4</sup>-H *TA*), 7.65 (m, 4H, C<sup>4</sup>-H *AP*-*Trp*).

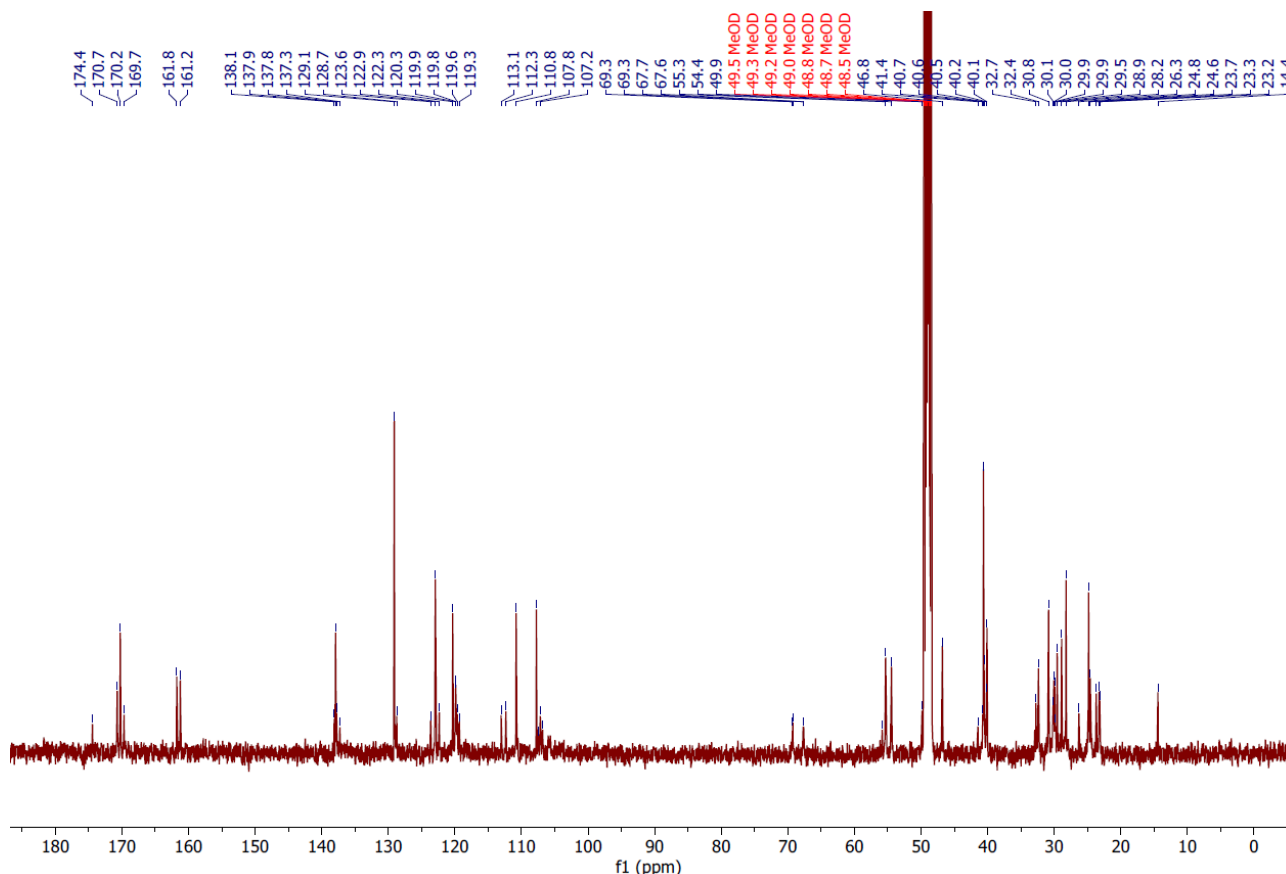

**<sup>13</sup>C NMR** (125 MHz, MeOD):  $\delta$  = 23.3, 23.7, 24.6 [ $\gamma$ C, 2 $\times$ O-(CH<sub>2</sub>)<sub>2</sub>-CH<sub>2</sub>-(CH<sub>2</sub>)<sub>2</sub>-NH], 24.8 (C<sup>3</sup> 5-*AP*), 26.3 (CH<sub>2</sub>-Ar *TA*), 28.2 ( $\delta$ C), 28.9 ( $\beta$ C *AP*-*Trp*), 29.6, 29.9-30.9 [ $\delta$ C, C<sup>2,4</sup> 5-*AP*, 2 $\times$ O-CH<sub>2</sub>-CH<sub>2</sub>-CH<sub>2</sub>-CH<sub>2</sub>-NH], 32.4, 32.8 ( $\beta$ C), 40.1-40.6 [2 $\times$ O-CH<sub>2</sub>-CH<sub>2</sub>-NH, 2 $\times$ O-(CH<sub>2</sub>)<sub>4</sub>-CH<sub>2</sub>-NH,  $\epsilon$ C, C<sup>5</sup> 5-*AP*], 41.5 (CH<sub>2</sub>-NH *TA*), 46.8 (C<sup>1</sup> 5-*AP*), 54.4 (4 $\times$  $\alpha$ C *L*-Lys), 55.3 (4 $\times$  $\alpha$ C *AP*-*Trp*), 55.8 ( $\alpha$ C *core*), 67.6 (2 $\times$ O-CH<sub>2</sub>-CH<sub>2</sub>-NH), 69.3 [2 $\times$ O-CH<sub>2</sub>-(CH<sub>2</sub>)<sub>4</sub>-NH], 105.7, 106.0 (C<sup>4</sup> *Ph*), 106.9, 107.2, 107.53, 107.8 (C<sup>2,6</sup> *Ph*), 110.8 (C<sup>7</sup> *AP*-*Trp*), 112.3 (C<sup>7</sup> *TA*), 113.1 (C<sup>3</sup> *TA*), 119.3 (C<sup>4</sup> *TA*), 119.6 (C<sup>5</sup> *TA*), 119.9 (C<sup>4</sup> *AP*-*Trp*), 120.3 (C<sup>5</sup> *AP*-*Trp*), 122.3 (C<sup>6</sup> *TA*), 122.9 (C<sup>6</sup> *AP*-*Trp*), 123.6 (C<sup>2</sup> *TA*), 128.7 (C<sup>3a</sup> *AP*-*Trp*, C<sup>3a</sup> *TA*), 129.1 (C<sup>2</sup> *AP*-*Trp*), 137.3, 137.8 (C<sup>1</sup> *Ph*), 137.9 (C<sup>7a</sup> *AP*-*Trp*), 138.1 (C<sup>7a</sup> *TA*), 161.2, 161.8 (C<sup>3,5</sup> *Ph*), 169.7 (CONH *Ph*), 170.2, 170.7, 174.4 (CONH).

[ $\alpha$ ]<sub>D</sub><sup>25</sup> = +6.3 (c 1, MeOH).

**m.p.:** 189-192°C.

## Dendrimer 25

Dendrimer **25** was obtained from 0.24 g (0.066 mmol) of dendrimer **23** in the form of pale yellow powder; yield 89.5% (0.17 g).

$C_{134}H_{211}O_{15}N_{27} \times 12HCl$ ,  $M = 2877.81$  (monoisotopic mass of non-protonated dendrimer 2438.7).

Mass without  $12HCl$   $M = 2440.28$ .

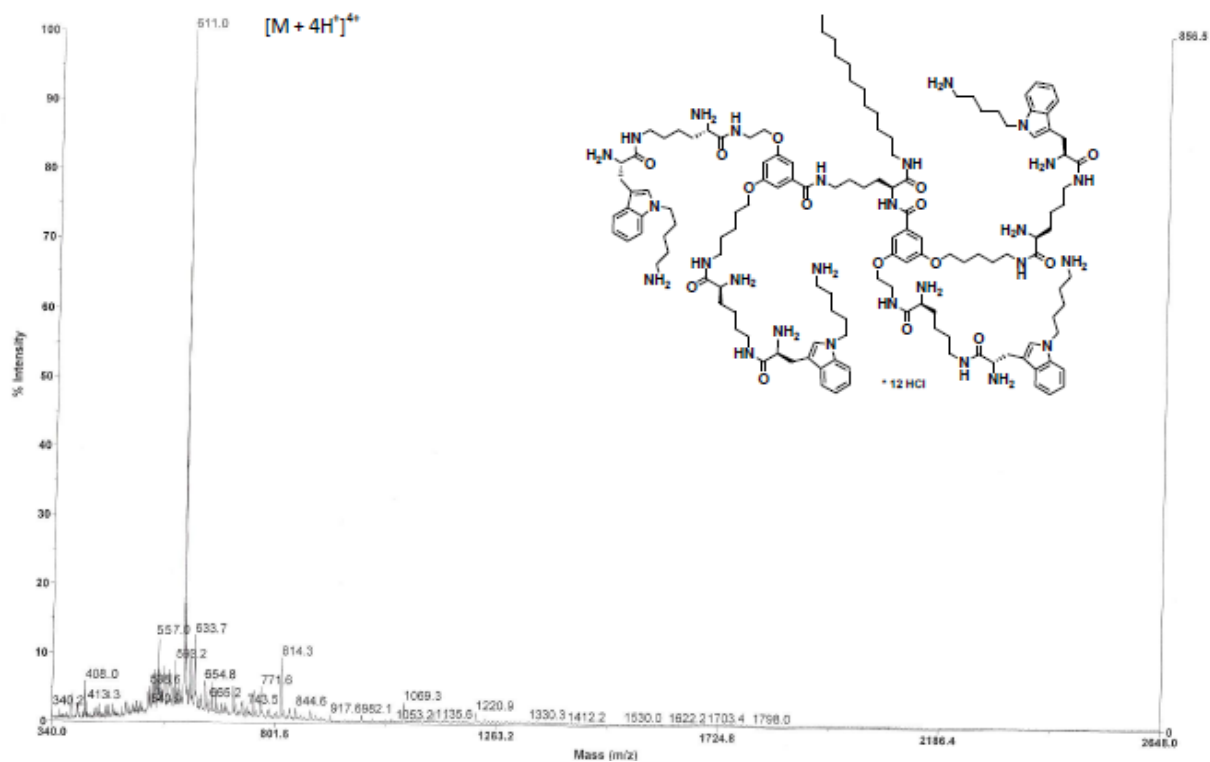

LRMS (ESI, MeOH): 610.7  $[M + 4H]^{4+}$ .

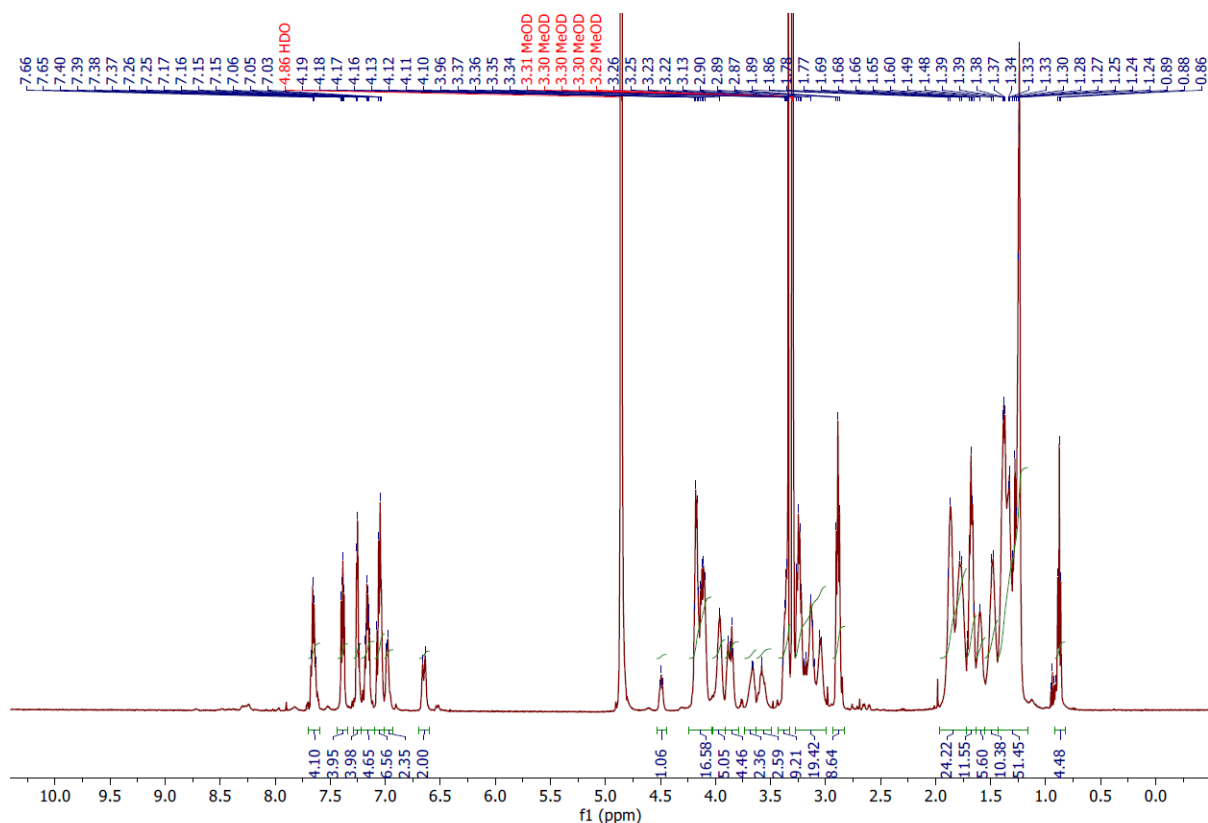

$^1\text{H}$  NMR (500 MHz, MeOD):  $\delta$  = 0.88 (br t, 3H,  $\text{CH}_3$  DDA), 1.20-1.93 (br m, 86H,  $5\times\gamma$ ,  $\delta$ ,  $\beta\text{CH}_2$  *L*-Lys and *core*,  $\text{CH}_2$ -2-11 DDA,  $2\times\text{O}-\text{CH}_2-(\text{CH}_2)_3-\text{CH}_2-\text{NH}$ ,  $4\times\text{CH}_2$ -2,3,4 5-AP), 2.89 (br t, 8H,  $4\times\text{CH}_2$ -5 5-AP), 2.90-3.40 [br m, 24H,  $5\times\epsilon\text{CH}_2$  *L*-Lys and *core*,  $\beta\text{CH}_2$  AP-Trp,  $2\times\text{O}-(\text{CH}_2)_4-\text{CH}_2-\text{NH}$ ,  $\text{CH}_2$ -1 DDA], 3.58, 3.66 (2m, 4H,  $2\times\text{O}-\text{CH}_2-\text{CH}_2-\text{NH}$ ), 3.87 (m, 4H,  $4\times\alpha\text{CH}$  *L*-Lys), 3.97 [m, 4H,  $2\times\text{O}-\text{CH}_2-(\text{CH}_2)_4-\text{NH}$ ], 4.07-4.22 (br m, 16H,  $2\times\text{O}-\text{CH}_2-\text{CH}_2-\text{NH}$ ,  $4\times\text{CH}_2$ -1 5-AP,  $4\times\alpha\text{CH}$  AP-Trp), 4.50 (m, 1H,  $\alpha\text{CH}$  *core*), 6.65 (m, 2H,  $\text{C}^4\text{-H}$  Ph), 6.98 (m, 2H,  $\text{C}^{2,6}\text{-H}$  Ph), 7.05 (m, 6H,  $\text{C}^{2,6}\text{-H}$  Ph,  $\text{C}^5\text{-H}$  AP-Trp), 7.16 (m, 4H,  $\text{C}^6\text{-H}$  AP-Trp), 7.25 (m, 4H,  $\text{C}^2\text{-H}$  AP-Trp), 7.39 (m, 4H,  $\text{C}^7\text{-H}$  AP-Trp), 7.66 (m, 4H,  $\text{C}^4\text{-H}$  AP-Trp).

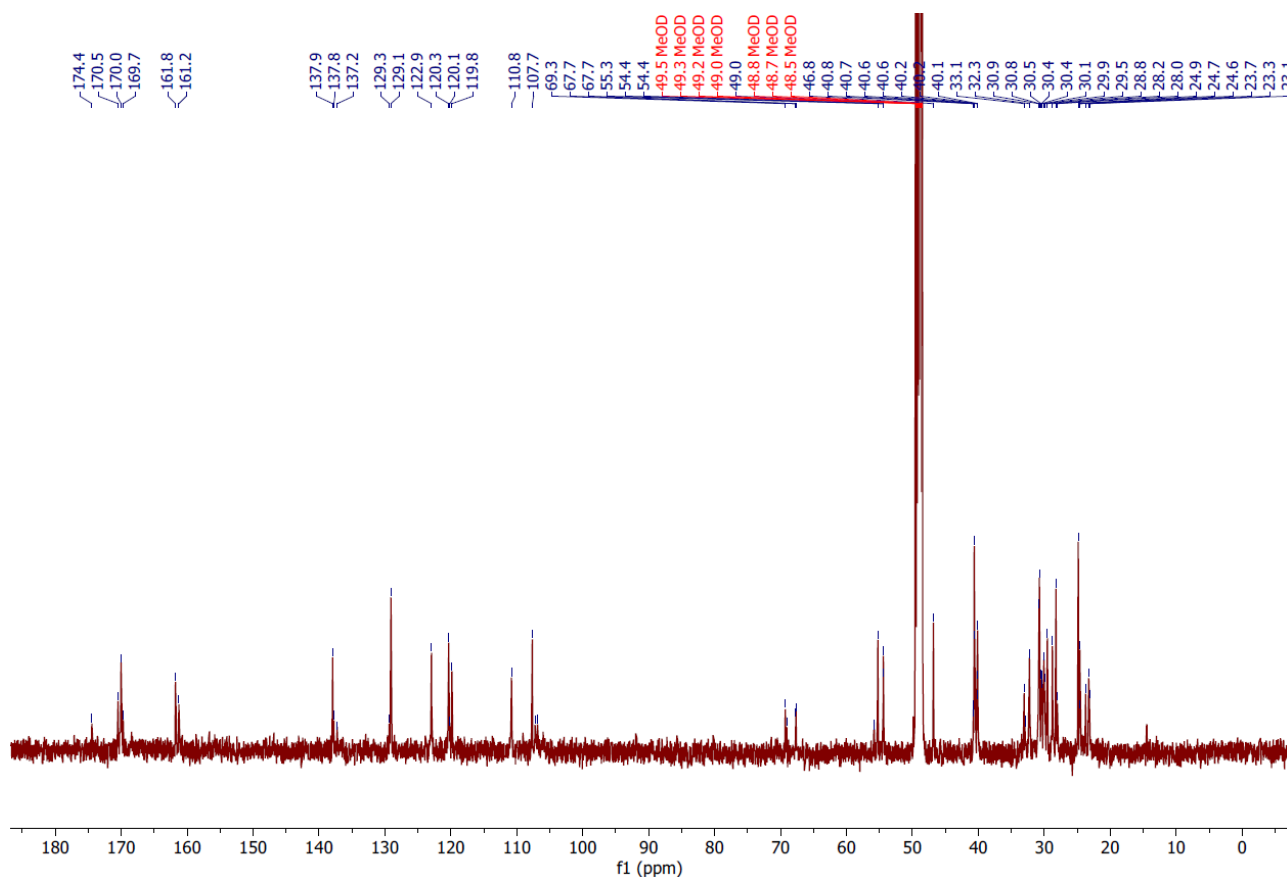

$^{13}\text{C}$  NMR (125 MHz, MeOD):  $\delta$  = 14.5 ( $\text{C}^{12}$  DDA), 23.1, 23.3, 23.7, 24.6 [ $\gamma\text{C}$ ,  $2\times\text{O}-(\text{CH}_2)_2-\text{CH}_2-(\text{CH}_2)_2-\text{NH}$ ,  $\text{C}^{11}$  DDA], 24.9 ( $\text{C}^3$  5-AP), 28.0 ( $\text{C}^3$  DDA), 28.2 ( $\delta\text{C}$ ), 28.8 ( $\beta\text{C}$  AP-Trp), 29.5, 30.1-30.9 [ $\delta\text{C}$ ,  $\text{C}^{2,4}$  5-AP,  $2\times\text{O}-\text{CH}_2-\text{CH}_2-\text{CH}_2-\text{CH}_2-\text{CH}_2-\text{NH}$ ,  $\text{C}^2$ ,  $\text{C}^4$ - $\text{C}^{10}$  DDA], 32.3, 33.1 ( $\beta\text{C}$ ), 40.1-40.6 [ $2\times\text{O}-\text{CH}_2-\text{CH}_2-\text{NH}$ ,  $2\times\text{O}-(\text{CH}_2)_4-\text{CH}_2-\text{NH}$ ,  $\epsilon\text{C}$ ,  $\text{C}^5$  5-AP,  $\text{C}^1$  DDA], 46.8 ( $\text{C}^1$  5-AP), 54.4 ( $4\times\alpha\text{C}$  L-Lys), 55.3 ( $4\times\alpha\text{C}$  AP-Trp), 55.8 ( $\alpha\text{C}$  core), 67.7 ( $2\times\text{O}-\text{CH}_2-\text{CH}_2-\text{NH}$ ), 69.3 [ $2\times\text{O}-\text{CH}_2-(\text{CH}_2)_4-\text{NH}$ ], 105.7, 106.0 ( $\text{C}^4$  Ph), 106.8, 107.1, 107.5, 107.7 ( $\text{C}^{2,6}$  Ph), 110.8 ( $\text{C}^7$  AP-Trp), 119.8 ( $\text{C}^4$  AP-Trp), 120.3 ( $\text{C}^5$  AP-Trp), 122.9 ( $\text{C}^6$  AP-Trp), 129.1 ( $\text{C}^2$  AP-Trp), 137.9 ( $\text{C}^{7a}$  AP-Trp), 161.2, 161.8 ( $\text{C}^{3,5}$  Ph), 170.0, 170.5 (CONH).

$[\alpha]_{\text{D}}^{25} = +6.6$  (c 1, MeOH).

**m.p.:** 184-187°C.
